# Supplementary material for: Comparison between Two-Dimensional and Point Shear Wave Elastography Techniques in Evaluating Liver Fibrosis Using Histological Staging as the Reference Standard: A Prospective Pilot Study
Source: MDPI journal article supplement (doi:10.3390/diagnostics13091646), 2023-05-07
Supplement: s1 [file s1]

# Supplementary Materials:

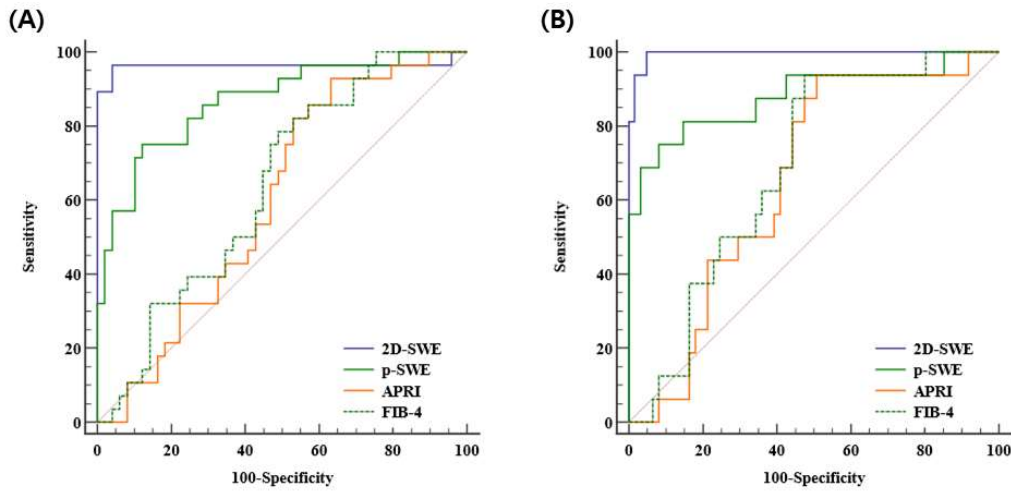

**Figure S1.** Area under the receiver operating curves of 2D-SWE, p-SWE, APRI, and FIB-4 in diagnosing significant fibrosis ( $\geq F2$ ) (A) and cirrhosis (F4) (B), 2D-SWE, two-dimensional shear wave elastography; p-SWE, point shear wave elastography; APRI, aspartate aminotransferase to platelet ratio index, FIB-4 = fibrosis index based on four factors

**Table S1.** Comparison of diagnostic performances of 2D-SWE, p-SWE, and biomarkers for diagnosis of significant fibrosis ( $\geq F2$ )

|                      | Significant Fibrosis ( $\geq F2$ ) |                    |                   |                    | <i>p</i> -Values |         |         |         |         |         |
|----------------------|------------------------------------|--------------------|-------------------|--------------------|------------------|---------|---------|---------|---------|---------|
|                      | 2D-SWE <sup>a</sup>                | p-SWE <sup>b</sup> | APRI <sup>c</sup> | FIB-4 <sup>d</sup> | a vs. b          | a vs. c | a vs. d | b vs. c | b vs. d | c vs. d |
| AUROC                | 0.965                              | 0.872              | 0.6               | 0.637              | 0.022            | <0.001  | <0.001  | <0.001  | 0.001   | 0.19    |
| 95% CI               | 0.895, 0.993                       | 0.777, 0.937       | 0.482, 0.710      | 0.520, 0.744       |                  |         |         |         |         |         |
| optimal cutoff value | 6.26 kPa                           | 7.08 kPa           | 0.472             | 2.33               |                  |         |         |         |         |         |
| sensitivity (%)      | 96.7                               | 75.9               | 83.3              | 80                 |                  |         |         |         |         |         |
| specificity (%)      | 95.9                               | 87.8               | 46.9              | 51                 |                  |         |         |         |         |         |

AUROC, area under the receiver operating curve; CI, confidence interval; 2D-SWE <sup>a</sup>, two-dimensional shear wave elastography; p-SWE <sup>b</sup>, point shear wave elastography; APRI <sup>c</sup>, aspartate aminotransferase to platelet ratio index; FIB-4 <sup>d</sup>, fibrosis index based on four factors.

**Table S2.** Comparison of diagnostic performances of 2D-SWE, p-SWE, and biomarkers for diagnosis of cirrhosis (F4)

|                      | Cirrhosis (F4)      |                    |                   |                    | <i>p</i> -Values |         |         |         |         |         |
|----------------------|---------------------|--------------------|-------------------|--------------------|------------------|---------|---------|---------|---------|---------|
|                      | 2D-SWE <sup>a</sup> | p-SWE <sup>b</sup> | APRI <sup>c</sup> | FIB-4 <sup>d</sup> | a vs. b          | a vs. c | a vs. d | b vs. c | b vs. d | c vs. d |
| AUROC                | 0.994               | 0.886              | 0.655             | 0.688              | 0.041            | <0.001  | <0.001  | 0.006   | 0.017   | 0.403   |
| 95% CI               | 0.943, 1.00         | 0.794, 0.947       | 0.538, 0.759      | 0.572, 0.788       |                  |         |         |         |         |         |
| optimal cutoff value | 8.4 kPa             | 9.3 kPa            | 0.597             | 2.37               |                  |         |         |         |         |         |
| sensitivity (%)      | 100                 | 76.5               | 94.4              | 94.4               |                  |         |         |         |         |         |
| specificity (%)      | 95.1                | 91.8               | 49.2              | 52.5               |                  |         |         |         |         |         |

AUROC, area under the receiver operating curve; CI, confidence interval; 2D-SWE <sup>a</sup>, two-dimensional shear wave elastography; p-SWE <sup>b</sup>, point shear wave elastography; APRI <sup>c</sup>, aspartate aminotransferase to platelet ratio index; FIB-4 <sup>d</sup>, fibrosis index based on four factors.
